# Supplementary figures and images for: Hirami lemon (Citrus reticulata var. depressa) modulates the gut–brain axis in a chronic mild stress-induced depression mouse model
Source: Royal Society of Chemistry journal article supplement (doi:10.1039/d3fo01301d), 2023-01-01

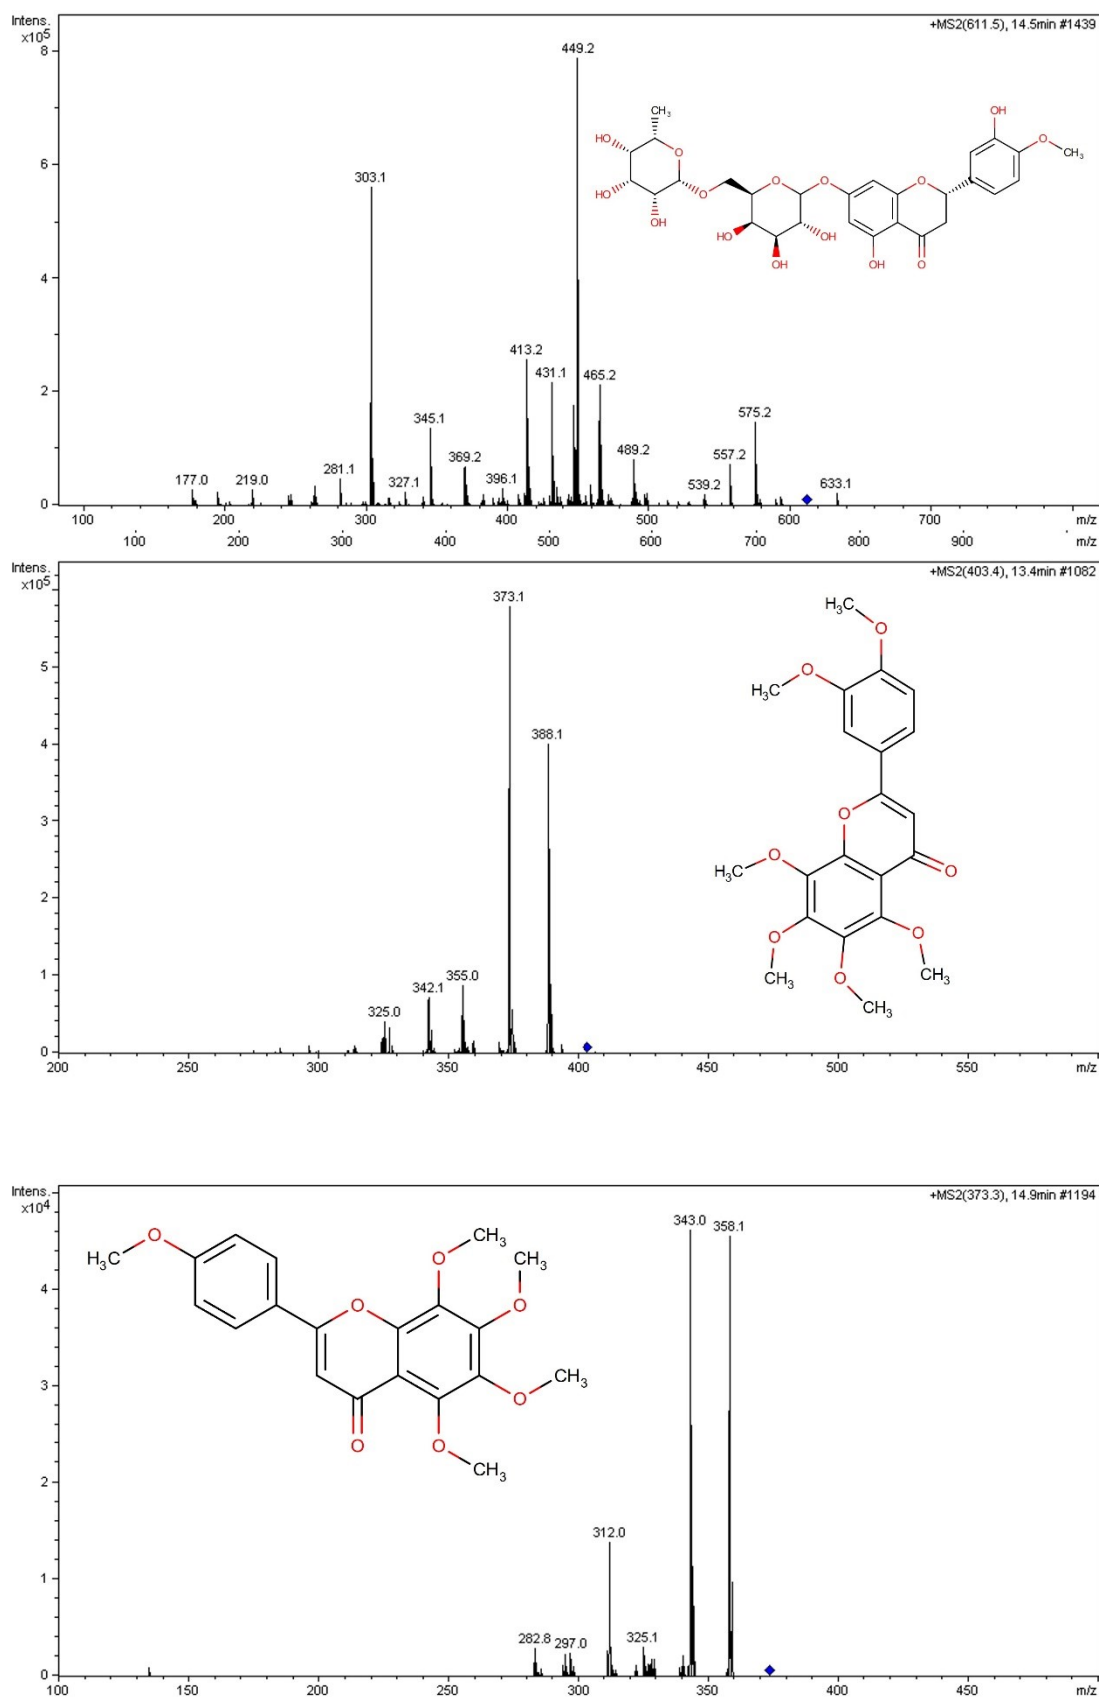

S1. The mass spectra of hesperidin, nobiletin and tangeretin.

Supplement: d3fo01301d1.pdf [file d3fo01301d1.pdf]
